# Supplementary material for: Biochemicals to enable biorefining: a case study of polyphenol extraction from bio-oil for utilization as a biodiesel antioxidant
Source: Royal Society of Chemistry journal article supplement (doi:10.1039/d5gc00184f), 2025-01-01
Supplement: d5gc00184f1.pdf [file d5gc00184f1.pdf]

## Supplementary Information

### **Biochemical to enable Biorefinery: A case study of polyphenols extraction from Bio-oil for Utilization as Biodiesel Antioxidants**

Xiaopeng Shi<sup>a</sup>, Haotong Lin<sup>a</sup>, Qi Ouyang<sup>a</sup>, Guanqun Luo<sup>b</sup>, Xianghong Lu<sup>c</sup>, Jianbing Ji<sup>c</sup> and Kaige Wang<sup>1,\*</sup>

<sup>a</sup> State Key Laboratory of Clean Energy Utilization, Zhejiang University, Hangzhou 310027, China

<sup>b</sup> Cryogenic Center, Hangzhou City University, Hangzhou 310015, China

<sup>c</sup> College of Chemical Engineering, Zhejiang University of Technology, Hangzhou 310014, China.

\* Corresponding author. Email address: kaigewang@zju.edu.cn

## 1. Theoretical induction time calculation method

The calculation formula is as follows:

$$IP_n = \frac{C_r}{C_m} gC_a gIP_m \quad (1)$$

$$IP_t = \sum_{i=1}^n IP_n \quad (2)$$

In the formula,  $IP_n$  represents the theoretical induction time of the  $n$ -th phenolic compound in the fraction;  $C_r$  denotes the relative content of the  $n$ -th phenolic compound in the fraction;  $C_a$  is the addition concentration of the fraction;  $C_m$  refers to the addition concentration of the corresponding model compound of the  $n$ -th phenolic compound, which is 0.1 wt.% in this study;  $IP_m$  is the induction time of the  $n$ -th phenolic model compound; and  $IP_t$  represents the total theoretical induction time of the phenolic compounds in the fraction. Here,  $n=1,2,3$ .

In addition, based on the addition concentrations of model compounds other than phenolic compounds and their corresponding average reduction in induction time for biodiesel, a functional relationship between the concentration of other compounds in the fraction and the percentage reduction in the fraction's induction time was established. The correlation coefficient was found to be 0.9989. The fitted formula is as follows:

$$y(x) = \frac{\sum_{i=0}^k IP_k / IP_0}{k} g00\% \quad (3)$$

$$Y = a g(X - b)^c \quad (4)$$

In the formula,  $x$  represents the addition concentration, which in this study was 0.1 wt.%, 0.2 wt.%, and 0.5 wt.%;  $y$  is the percentage reduction in average induction time caused by the other model compounds at the concentration  $x$ ;  $IP_k$  is the induction time of the  $k$ -th model compound;  $IP_0$  is the induction time of pure biodiesel;  $k=1, 2, 3, \dots$ ;  $Y$  is the theoretical percentage reduction in induction time caused by other compounds;  $X$  represents the total concentration of other compounds; and  $a$ ,  $b$ , and  $c$  are the fitting parameters.  $a = 0.24547 \pm 0.0334$ ,  $b = -0.0419 \pm 0.02473$ ,  $c = -0.44249 \pm 0.11945$ .

To comprehensively consider the impact of phenolic compounds and other compounds on the antioxidant properties of the distillate, the total theoretical induction time of the distillate can be calculated using the following equation( $IP_T$ ) :

$$IP_T = IP_t gY \quad (5)$$

## **2. Process flow for graded utilization of bio-oil**

The bio-oil is transferred from biorefinery to the distillation tower (D1), with no chemical reactions involved in the process. Under atmospheric pressure, the bio-oil is heated from room temperature to 110 °C in D1 for dehydration. The water vapor is cooled and transferred to the wastewater treatment unit (W1), while the remaining distillation fractions are cooled and transferred to the next-stage distillation tower (D2). The dehydrated bio-oil is distilled under a pressure of approximately 1 kPa to separate the 110 ~ 250 °C (after reaction, the biodiesel precursor) and 250 ~ 300 °C fractions, while the heavy fraction above 300 °C is designated as the bio-bitumen additive. All products are cooled by the cooling system (C1 ~ 5), with the biodiesel precursor and bio-bitumen additive sent to the storage system. At room temperature, the 250 ~ 300 °C fraction is sequentially extracted with 15 wt.% NaOH solution, 15 wt.% hydrochloric acid solution, and dichloromethane solvent in a mass ratio of 1:2. The extracted components are transferred to the solvent distillation recovery system (D4), while the remaining extraction components are sent to the acid-base solution recovery system (ARS). The sodium hydroxide and hydrochloric acid in the extraction process neutralize to produce sodium chloride, which is recovered through an electrolytic process for reuse of sodium hydroxide and hydrochloric acid. The wastewater generated during the process is transferred to WT. The extraction components are then separated from the dichloromethane solvent by vacuum distillation at 40°C to obtain bio-antioxygen, which is used as a biodiesel antioxidant, and is sent to the storage system. The dichloromethane solvent is recovered and reused. Wastewater generated from distillation, extraction, acid-base/solvent recovery, and other processes is treated biologically and recycled.

The specific technical parameters of this project were as follows: dehydration rate was 10%, dichloromethane recovery rate was 99.8%, sodium hydroxide recovery rate was 90%, hydrochloric acid recovery rate was 90%, wastewater recovery rate was 95%, extraction efficiency was 95%, biodiesel yield was 30%, bio-antioxygen yield was 19%, and bio-bitumen additive yield was 32%.

**Tab. S1. Oxidation induction period of other model compounds**

| Chemical                 | Addition concentration |          |          |
|--------------------------|------------------------|----------|----------|
|                          | 0.1 wt.%               | 0.2 wt.% | 0.5 wt.% |
| Acetic acid              | 0.03                   | 0.02     | 0.01     |
| 2- Acetylfuran           | 0.68                   | /        | /        |
| Cyclopentanone           | 0.43                   | 0.43     | 0.23     |
| 5- Hydroxy -2- pentanone | 0.62                   | /        | /        |
| Furfural                 | 0.38                   | 0.30     | 0.28     |
| Furfuryl alcohol         | 0.62                   | /        | /        |
| Methyl-phenoxide         | 0.57                   | 0.45     | 0.25     |

**Tab. S2. Technical indicators**

| Technical indicators            | Parameters         |
|---------------------------------|--------------------|
| Dehydration rate                | 10%                |
| Dichloromethane recovery rate   | 99.8% <sup>1</sup> |
| Sodium hydroxide recovery rate  | 90%                |
| Hydrochloric acid recovery rate | 90%                |
| Wastewater recovery rate        | 95% <sup>2</sup>   |
| Extraction efficiency           | 95%                |
| Biodiesel precursor yield       | 30%                |
| Bio-antioxygen yield            | 19%                |
| Bio-bitumen additive yield      | 32%                |

**Tab. S3. The equipment acquisition costs (base year: 2019)**

| Equipment                                       | Converted costs (\$) |
|-------------------------------------------------|----------------------|
| Distillation unit <sup>3</sup>                  | 798159.34            |
| Cooling unit <sup>4</sup>                       | 729972.53            |
| Extraction unit <sup>1</sup>                    | 664601.65            |
| Solvent distillation recovery unit <sup>1</sup> | 135741.76            |
| Acid-base recovery unit <sup>5</sup>            | 1252005.49           |
| Wastewater treatment unit <sup>6</sup>          | 1112239.01           |
| Storage unit <sup>7</sup>                       | 13131.87             |
| Total                                           | 4705837.91           |

**Tab. S4. The project investment cost calculation factors and results**

|                                                               | Calculation factors         | Cost (\$)   |
|---------------------------------------------------------------|-----------------------------|-------------|
| <b>Total installation and equipment purchase cost. (TIEC)</b> | <b>302% TPEC</b>            | 14211634.62 |
| <b>Total Purchased Equipment Cost (TPEC)</b>                  | <b>100% TPEC</b>            | 4705837.91  |
| Equipment installation                                        | 39% TPEC                    | 1835274.73  |
| Instruments and Control                                       | 26% TPEC                    | 471002.75   |
| Piping                                                        | 10% TPEC                    | 1223516.48  |
| Electronic Systems                                            | 31% TPEC                    | 1458804.95  |
| Warehouse                                                     | 29% TPEC                    | 1364697.80  |
| Site Development                                              | 12% TPEC                    | 564697.80   |
| Service Facilities                                            | 55% TPEC                    | 2588214.29  |
| <b>Total Indirect Costs (TIC)</b>                             | <b>89% TPEC</b>             | 4188200.55  |
| Engineering                                                   | 32% TPEC                    | 1505865.38  |
| Construction                                                  | 34% TPEC                    | 1599986.26  |
| Legal and Contractor Costs                                    | 23% TPEC                    | 1082348.90  |
| <b>Total Direct and Indirect Costs (TDIC)</b>                 | <b>TIEC+TIC</b>             | 18399835.16 |
| Contingency                                                   | 20% TDIC                    | 3679972.53  |
| <b>Fixed Capital Investment (FCI)</b>                         | <b>TIEC+TIC+Contingency</b> | 22079793.96 |
| Working Capital (WC)                                          | 15% FCI                     | 3311964.29  |
| Land Use (LU)                                                 | 6% TPEC                     | 282348.90   |
| <b>Total Project Investment (TPI)</b>                         | <b>FCI+WC+LU</b>            | 25674107.14 |

The equipment installation required a significant amount of materials and labor, including concrete and steel for support structures, electrical wiring, cables, pipelines, and valves. These factors contributed to the equipment installation costs, which could be estimated by applying a certain proportion factor (i.e., installation factor) to the equipment purchase cost. This led to the calculation of direct costs, which was the sum of the equipment purchase cost and the equipment installation cost. Indirect costs were expenses related to the construction of facilities, which were not characterized by equipment or materials. These included project costs, construction costs, legal and contractor fees. Construction costs represented labor-related benefits, such as retirement

benefits, workers' compensation, unemployment insurance, machinery rental, and cleanup costs after project completion. Contingency costs were additional expenses caused by project delays due to weather, construction errors, or inaccurate cost estimates. Working capital (WC) and land acquisition costs (LU) represented the project's operational cash flow and the cost of land acquisition for building facilities, respectively. Both were non-depreciable costs and did not lose value with usage. Working capital ensured the normal operation of the project, covering prepayments for raw material purchases, utility costs, labor wages, and supplies for ongoing operations. Working capital remained tied up throughout the project's lifespan and was recovered in monetary form after the project was completed.



**Tab. S5. Project Operating Cost Calculation Basis and Results**

|                                                                      | Calculation Basis                     | Cost (\$ per year) |
|----------------------------------------------------------------------|---------------------------------------|--------------------|
| Equipment Capacity Factor $f_0$                                      | 96%                                   |                    |
| <b>Raw Material Cost</b>                                             |                                       | 2449725.27         |
| Bio-oil                                                              | 54.95 \$/t                            | 2310439.56         |
| 99% Sodium Hydroxide                                                 | 412.09 \$/t                           | 99766.48           |
| 36% Hydrochloric Acid                                                | 41.21 \$/t                            | 25041.21           |
| Dichloromethane                                                      | 453.30 \$/t                           | 14491.76           |
| Water                                                                | 0.70 \$/t                             | 58914.84           |
| Electricity                                                          | 0.0834 \$/kWh                         | 1754203.30         |
| Operational Labor                                                    | Estimated based on scale <sup>7</sup> | 296703.30          |
| Managerial Labor                                                     | 20% Operational labor                 | 89010.99           |
| Maintenance and Repair                                               | 5% FCI                                | 1103983.52         |
| Operational Loss                                                     | 15% Maintenance and repair costs      | 165604.40          |
| Research Cost                                                        | 15% Labor costs                       | 57857.14           |
| <b>Variable Costs (VC)</b>                                           |                                       | 5976002.75         |
| Employee Benefits, Social Security Tax, Unemployment Insurance, etc. | 65% Labor and maintenance costs       | 968310.44          |
| Local Taxes                                                          | 1.5% FCI                              | 331195.05          |
| Insurance                                                            | 1% FCI                                | 220796.70          |
| <b>Fixed Costs (FC)</b>                                              |                                       | 1520329.67         |
| <b>Project Loan</b>                                                  | Self-financed                         |                    |
| <b>Annual Total Operating Cost</b>                                   | <b>DC+FC+CC</b>                       | <b>7496304.95</b>  |

Operating costs were calculated based on Fixed Capital Investment (FCI). Variable Costs (VC) included raw material costs, labor costs, water and electricity costs, and maintenance and repair costs. The unit prices for raw materials were referenced from various sales websites, and water and electricity prices were based on the relevant department's charging standards. Labor costs were estimated based on the actual scale of operations, with 30 operational workers, each

earning \$824.18 per month, and 20% of the operational workforce (6 people) assigned to management, earning \$1,236.26 per month. Fixed Costs (FC) consisted of employee benefits, local taxes, insurance, and other related expenses.

**Tab.S6. Discounted Cash Flow Analysis Factors**

| Factors                                      | Set Value                                   |
|----------------------------------------------|---------------------------------------------|
| Factory lifetime                             | 20 years                                    |
| Annual operating time                        | 8410 hours                                  |
| Equity financing                             | 100% (Self-financed)                        |
| Construction period                          | 3 years                                     |
| Year 1: Project preparation                  | 8% FCI                                      |
| Year 2: Engineering construction, etc.       | 60% FCI                                     |
| Year 3: Process equipment installation, etc. | 32% FCI                                     |
| Start-up period                              | 6 months                                    |
| Revenue                                      | 50%                                         |
| Variable operating costs                     | 75%                                         |
| Fixed operating costs                        | 100%                                        |
| Depreciation rate                            | Double Declining Balance Method<br>(200%DB) |
| Depreciation period                          | 7 years                                     |
| Benchmark discount rate $i_0$                | 10%                                         |
| Income tax rate                              | 25%                                         |
| Biodiesel price                              | 54.95 \$/t                                  |
| Bio-bitumen price                            | 412.09 \$/t                                 |

The double declining balance method was used to calculate the depreciation of fixed assets, with a depreciation period (payback period) of 7 years. This method provided the shortest payback period and the maximum tax deduction <sup>7</sup>. The calculation formula was as follows:

$$\begin{aligned}
 \text{Annual depreciation rate} &= \frac{2}{\text{Depreciation period}} \times 100\% \\
 \text{Depreciation balance for the current year} &= \text{Depreciation balance from the previous year} - \text{Depreciation expense for the current year}
 \end{aligned}
 \quad (6) \quad \left( \begin{array}{l} \text{Depreciation expense for the current year} \\ = \text{Depreciation balance from the previous year} \times \text{Annual depreciation rate} \end{array} \right)
 \quad (8)$$

The net present value (NPV) was the difference between the future cash flows generated by the project investment, discounted at the benchmark discount rate, and the investment costs :

$$NPV = \sum_{t=0}^n (CI_t - CO_t) (1 + i_0)^{-t} = \sum_{t=0}^n CF_t (1 + i_0)^{-t} \quad (9)$$

In the equation,  $CI_t$  represented the cash inflow in year  $t$ ;  $CO_t$  represented the cash outflow in year  $t$ ;  $i_0$  was the benchmark discount rate;  $CF_t$  was the net cash flow in year  $t$ ; and  $n$  denoted the project lifespan in years.

**Tab.S7. Discounted Cash Flow Analysis (\$)**

| Years                                 | -2          | -1           | 0            | 1            | 2           | 3           |
|---------------------------------------|-------------|--------------|--------------|--------------|-------------|-------------|
| Fixed Assets                          | 1766383.53  | 13247876.48  | 7065534.12   |              |             |             |
| Land Acquisition                      | 282350.31   |              |              |              |             |             |
| Working Capital                       |             |              | 3311969.12   |              |             |             |
| <b>Total Investment Cost</b>          | 2048733.84  | 13247876.48  | 10377503.24  |              |             |             |
| Main Product Sales Revenue            |             |              |              |              |             |             |
| By-product Sales Revenue              |             |              |              | 4678640.11   | 6238186.81  | 6238186.81  |
| <b>Total Sales Revenue</b>            |             |              |              | 11108044.04  | 14810725.38 | 14810725.38 |
| Variable Operating Costs              |             |              |              | 5229006.84   | 5976007.81  | 5976007.81  |
| Fixed Operating Costs                 |             |              |              | 1520302.45   | 1520302.45  | 1520302.45  |
| <b>Total Operating Costs</b>          |             |              |              | 6749309.28   | 7496310.26  | 7496310.26  |
| Depreciation Expense                  |             |              |              | 6308512.61   | 4506080.43  | 3218628.88  |
| Depreciation Balance                  |             |              |              | 15771281.52  | 11265201.09 | 8046572.20  |
| Net Income <sup>a</sup>               | -2048733.84 | -13247876.48 | -10377503.24 | -1949777.85  | 2808334.69  | 4095786.24  |
| Preliminary Losses                    | 0.00        | 2048733.84   | 15296610.32  | 25674113.56  | 27623891.41 | 24815556.72 |
| Taxable Income                        | -2048733.84 | -15296610.32 | -25674113.56 | -27623891.41 | -           | -           |
|                                       |             |              |              |              | 24815556.72 | 20719770.48 |
| Tax Payable                           |             |              |              |              |             |             |
| Annual Cash Inflow <sup>b</sup>       | -2048733.84 | -13247876.48 | -10377503.24 | 4358734.75   | 7314415.12  | 7314415.12  |
| Discount Factor <sup>c</sup>          | 1.21        | 1.10         | 1.00         | 0.91         | 0.83        | 0.75        |
| Annual Net Present Value <sup>d</sup> | -2478967.95 | -14572664.13 | -10377503.24 | 3962486.14   | 6044971.18  | 5495428.34  |

**Tab.S7. Discounted Cash Flow Analysis (\$)**

| Years                                 | 4            | 5            | 6           | 7           | 8           | 9           |
|---------------------------------------|--------------|--------------|-------------|-------------|-------------|-------------|
| Fixed Assets                          |              |              |             |             |             |             |
| Land Acquisition                      |              |              |             |             |             |             |
| Working Capital                       |              |              |             |             |             |             |
| <b>Total Investment Cost</b>          |              |              |             |             |             |             |
| Main Product Sales Revenue            | 8572538.57   | 8572538.57   | 8572538.57  | 8572538.57  | 8572538.57  | 8572538.57  |
| By-product Sales Revenue              | 6238186.81   | 6238186.81   | 6238186.81  | 6238186.81  | 6238186.81  | 6238186.81  |
| <b>Total Sales Revenue</b>            | 14810725.38  | 14810725.38  | 14810725.38 | 14810725.38 | 14810725.38 | 14810725.38 |
| Variable Operating Costs              | 5976007.81   | 5976007.81   | 5976007.81  | 5976007.81  | 5976007.81  | 5976007.81  |
| Fixed Operating Costs                 | 1520302.45   | 1520302.45   | 1520302.45  | 1520302.45  | 1520302.45  | 1520302.45  |
| <b>Total Operating Costs</b>          | 7496310.26   | 7496310.26   | 7496310.26  | 7496310.26  | 7496310.26  | 7496310.26  |
| Depreciation Expense                  | 2299020.63   | 1642157.59   | 1172969.71  | 837835.51   |             |             |
| Depreciation Balance                  | 5747551.57   | 4105393.98   | 2932424.27  | 2094588.77  |             |             |
| Net Income <sup>a</sup>               | 5015394.49   | 5672257.53   | 6141445.41  | 6476579.62  | 7314415.12  | 7314415.12  |
| Preliminary Losses                    | 20719770.48  | 15704375.99  | 10032118.46 | 3890673.04  |             |             |
| Taxable Income                        | -15704375.98 | -10032118.45 | -3890673.04 | 2585906.57  | 7314415.12  | 7314415.12  |
| Tax Payable                           |              |              |             | 646476.64   | 1828603.78  | 1828603.78  |
| Annual Cash Inflow <sup>b</sup>       | 7314415.12   | 7314415.12   | 7314415.12  | 6667938.48  | 5485811.34  | 5485811.34  |
| Discount Factor <sup>c</sup>          | 0.68         | 0.62         | 0.56        | 0.51        | 0.47        | 0.42        |
| Annual Net Present Value <sup>d</sup> | 4995843.95   | 4541676.32   | 4128796.65  | 3421706.76  | 2559171.48  | 2326519.52  |

**Tab.S7. Discounted Cash Flow Analysis (\$)**

| Years                                 | 10          | 11          | 12          | 13          | 14          | 15          |
|---------------------------------------|-------------|-------------|-------------|-------------|-------------|-------------|
| Fixed Assets                          |             |             |             |             |             |             |
| Land Acquisition                      |             |             |             |             |             |             |
| Working Capital                       |             |             |             |             |             |             |
| <b>Total Investment Cost</b>          |             |             |             |             |             |             |
| Main Product Sales Revenue            | 8572538.57  | 8572538.57  | 8572538.57  | 8572538.57  | 8572538.57  | 8572538.57  |
| By-product Sales Revenue              | 6238186.81  | 6238186.81  | 6238186.81  | 6238186.81  | 6238186.81  | 6238186.81  |
| <b>Total Sales Revenue</b>            | 14810725.38 | 14810725.38 | 14810725.38 | 14810725.38 | 14810725.38 | 14810725.38 |
| Variable Operating Costs              | 5976007.81  | 5976007.81  | 5976007.81  | 5976007.81  | 5976007.81  | 5976007.81  |
| Fixed Operating Costs                 | 1520302.45  | 1520302.45  | 1520302.45  | 1520302.45  | 1520302.45  | 1520302.45  |
| <b>Total Operating Costs</b>          | 7496310.26  | 7496310.26  | 7496310.26  | 7496310.26  | 7496310.26  | 7496310.26  |
| Depreciation Expense                  |             |             |             |             |             |             |
| Depreciation Balance                  |             |             |             |             |             |             |
| Net Income <sup>a</sup>               | 7314415.12  | 7314415.12  | 7314415.12  | 7314415.12  | 7314415.12  | 7314415.12  |
| Preliminary Losses                    |             |             |             |             |             |             |
| Taxable Income                        | 7314415.12  | 7314415.12  | 7314415.12  | 7314415.12  | 7314415.12  | 7314415.12  |
| Tax Payable                           | 1828603.78  | 1828603.78  | 1828603.78  | 1828603.78  | 1828603.78  | 1828603.78  |
| Annual Cash Inflow <sup>b</sup>       | 5485811.34  | 5485811.34  | 5485811.34  | 5485811.34  | 5485811.34  | 5485811.34  |
| Discount Factor <sup>c</sup>          | 0.39        | 0.35        | 0.32        | 0.29        | 0.26        | 0.24        |
| Annual Net Present Value <sup>d</sup> | 2115017.75  | 1922743.41  | 1747948.55  | 1589044.14  | 1444585.58  | 1313259.62  |

**Tab.S7. Discounted Cash Flow Analysis (\$)**

| Years                                 | 16          | 17          | 18          | 19          | 20          |
|---------------------------------------|-------------|-------------|-------------|-------------|-------------|
| Fixed Assets                          |             |             |             |             |             |
| Land Acquisition                      |             |             |             |             | -282350.31  |
| Working Capital                       |             |             |             |             | -3311969.12 |
| <b>Total Investment Cost</b>          |             |             |             |             | -3594319.43 |
| Main Product Sales Revenue            | 8572538.57  | 8572538.57  | 8572538.57  | 8572538.57  | 8572538.57  |
| By-product Sales Revenue              | 6238186.81  | 6238186.81  | 6238186.81  | 6238186.81  | 6238186.81  |
| <b>Total Sales Revenue</b>            | 14810725.38 | 14810725.38 | 14810725.38 | 14810725.38 | 14810725.38 |
| Variable Operating Costs              | 5976007.81  | 5976007.81  | 5976007.81  | 5976007.81  | 5976007.81  |
| Fixed Operating Costs                 | 1520302.45  | 1520302.45  | 1520302.45  | 1520302.45  | 1520302.45  |
| <b>Total Operating Costs</b>          | 7496310.26  | 7496310.26  | 7496310.26  | 7496310.26  | 7496310.26  |
| Depreciation Expense                  |             |             |             |             |             |
| Depreciation Balance                  |             |             |             |             |             |
| Net Income <sup>a</sup>               | 7314415.12  | 7314415.12  | 7314415.12  | 7314415.12  | 10908734.55 |
| Preliminary Losses                    |             |             |             |             |             |
| Taxable Income                        | 7314415.12  | 7314415.12  | 7314415.12  | 7314415.12  | 10908734.55 |
| Tax Payable                           | 1828603.78  | 1828603.78  | 1828603.78  | 1828603.78  | 2727183.64  |
| Annual Cash Inflow <sup>b</sup>       | 5485811.34  | 5485811.34  | 5485811.34  | 5485811.34  | 8181550.91  |
| Discount Factor <sup>c</sup>          | 0.22        | 0.20        | 0.18        | 0.16        | 0.15        |
| Annual Net Present Value <sup>d</sup> | 1193872.38  | 1085338.53  | 986671.39   | 896973.99   | 1216135.41  |

<sup>a</sup> : Net Income = Total Sales – Total Costs – Depreciation ;

<sup>b</sup> : Annual Cash Inflow = Total Sales – Total Costs – Tax Amount ;



<sup>c</sup> : *Discount Factor* =  $(1 + i_0)^{-t}$ ,  $i_0$  is the base discount rate,  $t$  is the year ;

<sup>d</sup> : Annual Net Present Value = Annual Cash Inflow  $\times$  Discount Factor

## References:

- (1) Aghazadeh, M.; Engelberth, A. S. Techno-economic analysis for incorporating a liquid-liquid extraction system to remove acetic acid into a proposed commercial scale biorefinery. *Biotechnol. Prog.* **2016**, *32* (4), 971-977. DOI: 10.1002/btpr.2325.
- (2) Medina-Martos, E.; Istrate, I.-R.; Villamil, J. A.; Gálvez-Martos, J.-L.; Dufour, J.; Mohedano, Á. F. Techno-economic and life cycle assessment of an integrated hydrothermal carbonization system for sewage sludge. *Journal of Cleaner Production* **2020**, *277*, 122930.
- (3) Vardanega, R.; Carvalho, P. I. N.; Albarelli, J. Q.; Santos, D. T.; Meireles, M. A. A. Techno-economic evaluation of obtaining Brazilian ginseng extracts in potential production scenarios. *Food Bioprod. Process.* **2017**, *101*, 45-55. DOI: 10.1016/j.fbp.2016.10.010.
- (4) Orive, M.; Cebrián, M.; Amayra, J.; Zufia, J.; Bald, C. Techno-economic assessment of a biorefinery plant for extracted olive pomace valorization. *Process Saf. Environ. Prot.* **2021**, *147*, 924-931. DOI: 10.1016/j.psep.2021.01.012.
- (5) Ankoliya, D.; Mudgal, A.; Sinha, M. K.; Davies, P.; Park, K.; Alegre, R. R.; Patel, V.; Patel, J. Techno-economic analysis of integrated bipolar membrane electrodialysis and batch reverse osmosis for water and chemical recovery from dairy wastewater. *Journal of Cleaner Production* **2023**, *420*, 138264.
- (6) Campana, P. E.; Mainardis, M.; Moretti, A.; Cottés, M. 100% renewable wastewater treatment plants: Techno-economic assessment using a modelling and optimization approach. *Energy Conversion and Management* **2021**, *239*, 114214.
- (7) Humbird, D.; Davis, R.; Tao, L.; Kinchin, C.; Hsu, D.; Aden, A.; Schoen, P.; Lukas, J.; Olthof, B.; Worley, M. *Process design and economics for biochemical conversion of lignocellulosic biomass to ethanol: dilute-acid pretreatment and enzymatic hydrolysis of corn stover*; National Renewable Energy Lab.(NREL), Golden, CO (United States), 2011.
